# Supplementary material for: Aramchol downregulates stearoyl CoA-desaturase 1 in hepatic stellate cells to attenuate cellular fibrogenesis
Source: PubMed Central journal article supplement (PMC8189934; doi:10.1016/j.jhepr.2021.100237), 2021-01-28
Supplement: mmc3.pdf [file mmc3.pdf]

## JHEP Reports CTAT methods

Tables for a “Complete, Transparent, Accurate and Timely account” (CTAT) are now mandatory for all revised submissions. The aim is to enhance the reproducibility of methods.

- Only include the parts relevant to your study
- Refer to the CTAT in the main text as ‘Supplementary CTAT Table’
- Do not add subheadings
- Add as many rows as needed to include all information
- Only include one item per row

**If the CTAT form is not relevant to your study, please outline the reasons why:**

|  |
|--|
|  |
|--|

### 1.1 Antibodies

| Name                                                             | Citation                                   | Supplier                     | Cat no.     | Clone no.                                                                                     |
|------------------------------------------------------------------|--------------------------------------------|------------------------------|-------------|-----------------------------------------------------------------------------------------------|
| Anti-alpha smooth muscle Actin antibody                          | Manufacturer website                       | Abcam                        | ab5694      | Synthetic peptide corresponding to Human alpha smooth muscle Actin (N terminal)               |
| Anti-PPAR gamma                                                  | Manufacturer website                       | Abcam                        | ab27649     | Synthetic peptide conjugated to KLH derived from within residues 50 - 150 of Human PPAR gamma |
| Anti-SCD1 antibody                                               | Manufacturer website                       | Abcam                        | ab19862     | CD.E10                                                                                        |
| Anti-GAPDH Mouse mAb                                             | PMID: 16005468                             | Millipore Sigma              | CB1001      | 6C5                                                                                           |
| Peroxidase AffiniPure Goat Anti-Rabbit IgG, Fc fragment specific | Zhao, Q., et.al. (2019) Genome Med. 11, 23 | Jackson Immuno Research Labs | 111-035-008 | RRID:AB_2337937                                                                               |
| Anti-mouse IgG, HRP-linked Antibody                              | PMID: 32968434                             | Cell Signaling Technology    | 7076        | N/A                                                                                           |

### 1.2 Cell lines

| Name | Citation       | Supplier     | Cat no. | Passage no. | Authentication test method |
|------|----------------|--------------|---------|-------------|----------------------------|
| LX-2 | PMID: 15591520 | Developed in | N/A     | 18          | 1. Mycoplasma test         |

|                                     |                                  |                                              |         |     |                                                                                                                                                                                               |
|-------------------------------------|----------------------------------|----------------------------------------------|---------|-----|-----------------------------------------------------------------------------------------------------------------------------------------------------------------------------------------------|
|                                     |                                  | Friedman Lab                                 |         |     | 2. Fibrogenic gene expression (RT-qPCR)<br>3. Profibrotic protein expression (western blot)<br><br>4. mRNA seq                                                                                |
| Primary Human Hepatic Stellate Cell | PMID: 1735526                    | Cell isolation from 3 donors in Friedman lab | N/A     | 3   | 1. Mycoplasma test<br>2. Immunostaining: Desmin, GFAP, $\alpha$ SMA, CD31, CD68<br>3. Fibrogenic gene expression (RT-qPCR)<br>5. Profibrotic protein expression (western blot)<br>5. mRNA seq |
| Primary Human Hepatocytes           | PMID: 26592180<br>PMID: 25092305 | BioIVT (New York, NY)                        | 00995-P | N/A | 1. Secreted albumin and $\alpha$ 1-Antitrypsin (AAT) by ELISA<br>2. CYP3A4 activity assay                                                                                                     |

### 1.3 Organisms – not applicable

| Name | Citation | Supplier | Strain | Sex | Age | Overall n number |
|------|----------|----------|--------|-----|-----|------------------|
|      |          |          |        |     |     |                  |

### 1.4 Sequence based reagents

| Name                               | Sequence        | Supplier |
|------------------------------------|-----------------|----------|
| TruSeq® Stranded mRNA Library Prep | mRNA sequencing | Illumina |

### 1.5 Biological samples – not applicable

| Description | Source | Identifier |
|-------------|--------|------------|
|             |        |            |

## 1.6 Deposited data

| Name of repository | Identifier  | Link                                                                                  |
|--------------------|-------------|---------------------------------------------------------------------------------------|
| ArrayExpress       | E-MTAB-9870 | <a href="https://www.ebi.ac.uk/arrayexpress/">https://www.ebi.ac.uk/arrayexpress/</a> |

## 1.7 Software

| Software name               | Manufacturer                  | Version      |
|-----------------------------|-------------------------------|--------------|
| Gen5 Microplate for Windows | BioTek Instruments            | 3.10         |
| LightCycler 480 SW 1.5.1    | Roche Diagnostics Corporation | 1.5.1.62     |
| 2100 Expert                 | Agilent                       | B.02.11      |
| STAR                        | GitHub                        | 2.4.0c       |
| RSeQC                       | SourceFroge                   | 3.0.1        |
| Picard                      | SourceForge                   | 1.119        |
| ImageJ                      | NIH                           | 1.52a        |
| ZEN 2.6 (blue edition)      | Carl Zeiss                    | 2.6.76.00000 |
| GraphPAD Prism              |                               | 8.0.1        |

## 1.8 Other (e.g. drugs, proteins, vectors etc.)

|                                                                                                           |                                              |                                                                                         |
|-----------------------------------------------------------------------------------------------------------|----------------------------------------------|-----------------------------------------------------------------------------------------|
| <b>Drug</b> - Aramchol (arachidyl amido cholanoic acid) (F.W. 702.118)                                    | <b>Manufacturer</b> - Galmed Pharmaceuticals | <b>Purity</b> - >99%                                                                    |
| <b>siRNA</b> – SCD1 SMART pool (Accession no NM_005063); red fluorescent non-targeting control pool siRNA | <b>Manufacturer</b> - Horizon Discovery      | <b>Cat. no:</b> E-005061-00-0010 (for SCD1); D-001910-10-20 (for non-targeting control) |
| <b>Vector</b> - pCMV6-Entry plasmid ; pCMV6-SCD1 plasmid (SCD1 Accession no NM_005063)                    | <b>Manufacturer</b> - Origene                | <b>Cat. no:</b> PS100001 (for Entry plasmid) ; RC209148 (for human SCD1 plasmid)        |

## 1.9 Please provide the details of the corresponding methods author for the manuscript:

### Dipankar Bhattacharya, MS

Box 1123, Icahn School of Medicine at Mount Sinai  
 1425 Madison Ave, Room 1176  
 New York, NY 10025, USA  
 Tel (212) 659-9524  
 Fax 212 849 2574  
 Email: Dipankar.bhattacharya@mssm.edu

**2.0 Please confirm for randomised controlled trials all versions of the clinical protocol are included in the submission. These will be published online as supplementary information.**

**Not applicable**
